# Supplementary material
Source: Springer Nature journal article supplement (https://www.springermedizin.de/resource/supplementary/12879_2013_3183_MOESM3_ESM.pdf/9446140)
Supplement: MOESM3 [file 9446140]

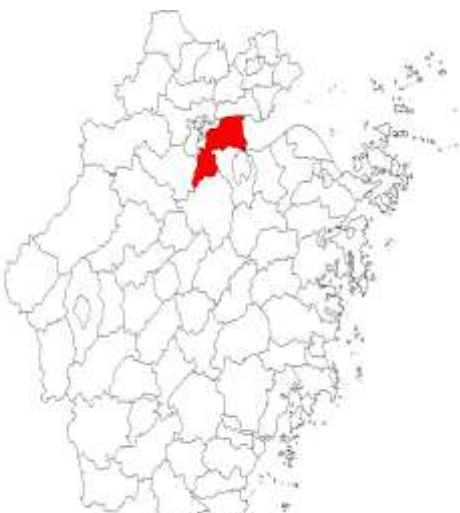

1 cases/1 county The 10th week

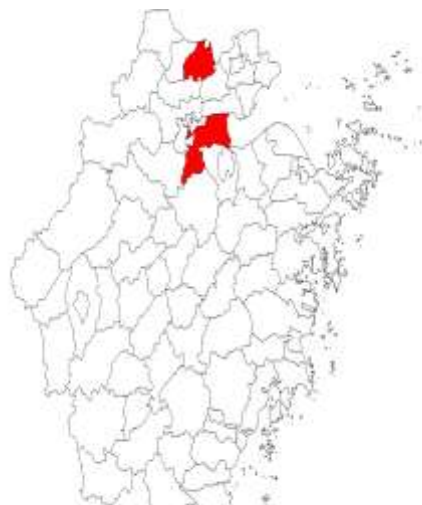

3 cases/3 counties The 12th week

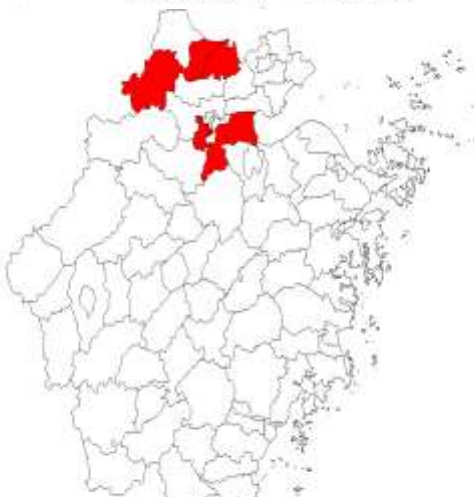

7 cases/6 counties The 13th week

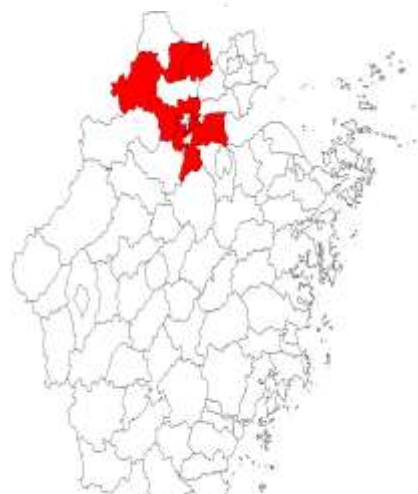

14 cases/8 counties The 14th week

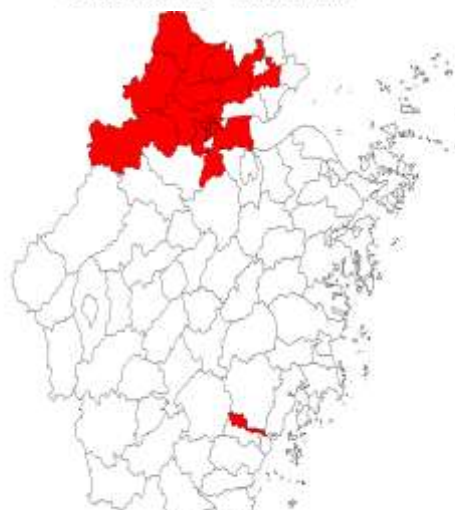

38 cases/16 counties The 15th week

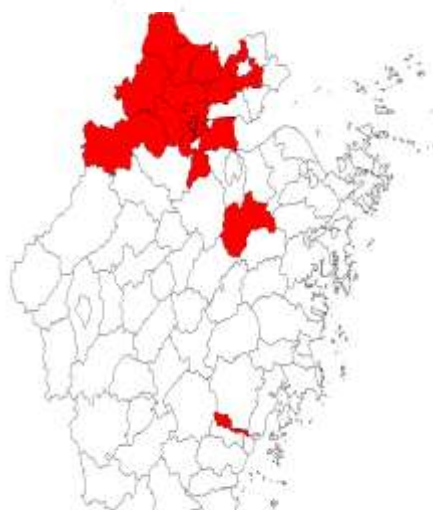

46 cases/17 counties The 16th week
